# Supplementary material for: Dynamically Cross-Linked Tannin as a Reinforcement of Polypropylene and UV Protection Properties
Source: PubMed Central journal article supplement (PMC6401781; doi:10.3390/polym11010102), 2019-01-09
Supplement: polymers-11-00102-s001.pdf [file polymers-11-00102-s001.pdf]

# Dynamically crosslinked tannin as a reinforcement of polypropylene and UV protection properties

Jingjing LIAO<sup>1</sup>, Nicolas BROSSE<sup>1\*</sup>, Antonio PIZZI<sup>1</sup> and Sandrine HOPPE<sup>2</sup>

## Supplementary materials

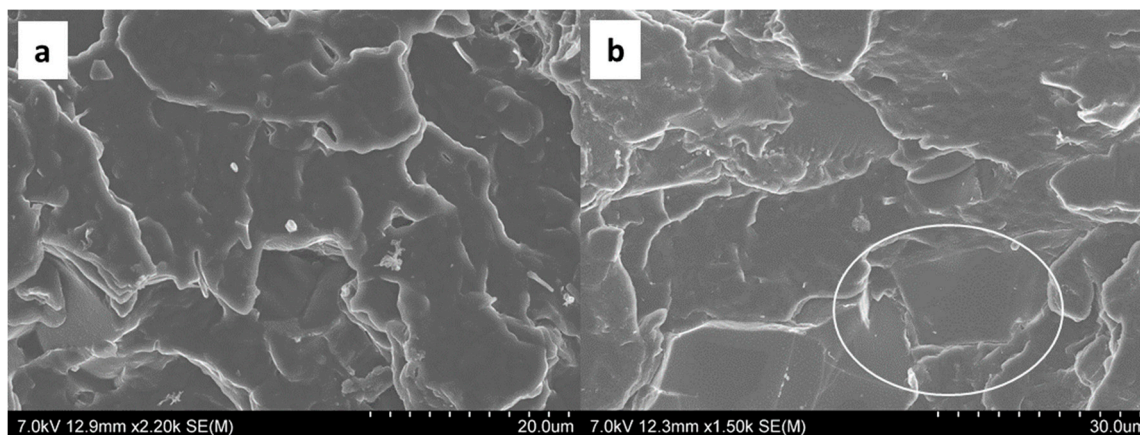

Figure S1 (a)PP+10% crosslinked tannin; (b) PP+ 30% crosslinked tannin

Table S1 Comparison of tensile property of tannin(T), dynamic crosslinked tannin(TH)

| Sample       | Young's modulus<br>(GPa) | Tensile strength<br>(MPa) | Elongation<br>(%) |
|--------------|--------------------------|---------------------------|-------------------|
| PP           | 1.53±0.08                | 34±3                      | 52±28             |
| PP+10T+PPMA  | 1.41±0.08                | 33±1                      | 21±8              |
| PP+10TH+PPMA | 1.80±0.05                | 31±1                      | 32±10             |

Table S2 Comparison of tensile property with or without compatibilizer (MAPP)

| Sample       | Young's modulus<br>(GPa) | Tensile strength<br>(MPa) | Elongation<br>(%) |
|--------------|--------------------------|---------------------------|-------------------|
| PP           | 1.53±0.08                | 34±3                      | 52±28             |
| PP+10TH      | 1.60±0.05                | 30±1                      | 15±2              |
| PP+10TH+MAPP | 1.84±0.05                | 31±1                      | 32±10             |

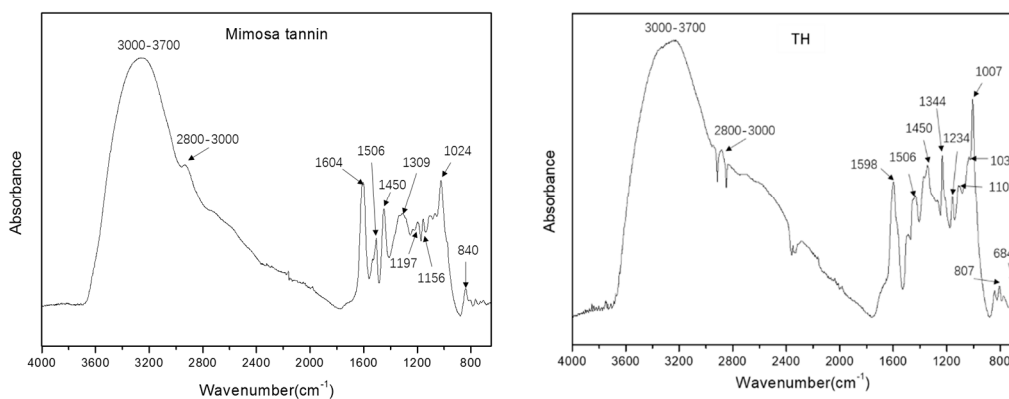

**Figure S2** FTIR spectra of pre-reacted tannin-hexamine (TH)

**Table S3** Assignment of FT-IR spectra of mimosa tannin and pre-reacted TH

| Peak(cm <sup>-1</sup> ) | Assignment                                                                         |
|-------------------------|------------------------------------------------------------------------------------|
| 3000-3700               | O-H stretching of benzene nucleus, methylol groups of tannins                      |
| 2700-2800               | C-H stretching, -CH <sub>2</sub> - and -CH <sub>2</sub> OCH <sub>2</sub> - bridges |
| 1604,1598               | C=C aromatic rings stretching                                                      |
| 1506                    | C=C aromatic rings stretching                                                      |
| 1450                    | C=C aromatic rings stretching                                                      |
| 1309                    | C-C frame stretching                                                               |
| 1197                    | C-OH bending                                                                       |
| 1156                    | C-O groups of the A-ring resorcinol-like structure                                 |
| 1024                    | C-H aromatic rings in-plane bending                                                |
| 840                     | C-H deformation in plane                                                           |
| 1344                    | the C-O stretching of the B-ring of pyrogalllic moieties.                          |
| 1234                    | antisymmetric deformation of C-O-C in ether groups                                 |
| 1007                    | C-N groups                                                                         |
| 807                     | Deformation vibrations CH bonds                                                    |
